# Supplementary material
Source: PubMed Central journal article supplement (PMC4987862)

# Supporting Information

## **NADH:Cytochrome b<sub>5</sub> Reductase and Cytochrome b<sub>5</sub> Can Act as Sole Electron Donors to Human Cytochrome P450 1A1-Mediated Oxidation and DNA Adduct Formation by Benzo[a]pyrene**

**Marie Stiborová,<sup>\*†</sup> Radek Indra,<sup>†</sup> Michaela Moserová,<sup>†</sup> Eva Frei,<sup>†</sup> Heinz H. Schmeiser,<sup>‡</sup>  
Klaus Kopka,<sup>†</sup> David H. Phillips,<sup>§,⊥</sup> and Volker M. Arlt<sup>§,⊥</sup>**

<sup>†</sup>*Department of Biochemistry, Faculty of Science, Charles University, Albertov 2030, 128 40  
Prague 2, Czech Republic*

<sup>‡</sup>*Division of Radiopharmaceutical Chemistry, German Cancer Research Center (DKFZ), Im  
Neuenheimer Feld 280, 69120 Heidelberg, Germany*

<sup>§</sup>*Analytical and Environmental Sciences Division, MRC-PHE Centre for Environment and  
Health, King's College London, Franklin-Wilkins Building, 150 Stamford Street, London SE1  
9NH, United Kingdom*

<sup>⊥</sup>*NIHR Health Protection Research Unit in Health Impact of Environmental Hazards at  
King's College London in partnership with Public Health England, Franklin-Wilkins  
Building, 150 Stamford Street, London SE1 9NH, United Kingdom*

**Figure S1.** Amounts of BaP metabolites generated by human P450 1A1 reconstituted with POR or CBR with or without cytochrome *b*<sub>5</sub> (cyt *b*<sub>5</sub>). Incubations were carried out in the presence of NADPH or NADH. ND, not detected.  $\Delta\Delta\Delta P < 0.001$  (Student's *t*-test), significantly different from incubations without cytochrome *b*<sub>5</sub>;  $***P < 0.001$  (Student's *t*-test), significantly different from incubations with NADPH as cofactor.

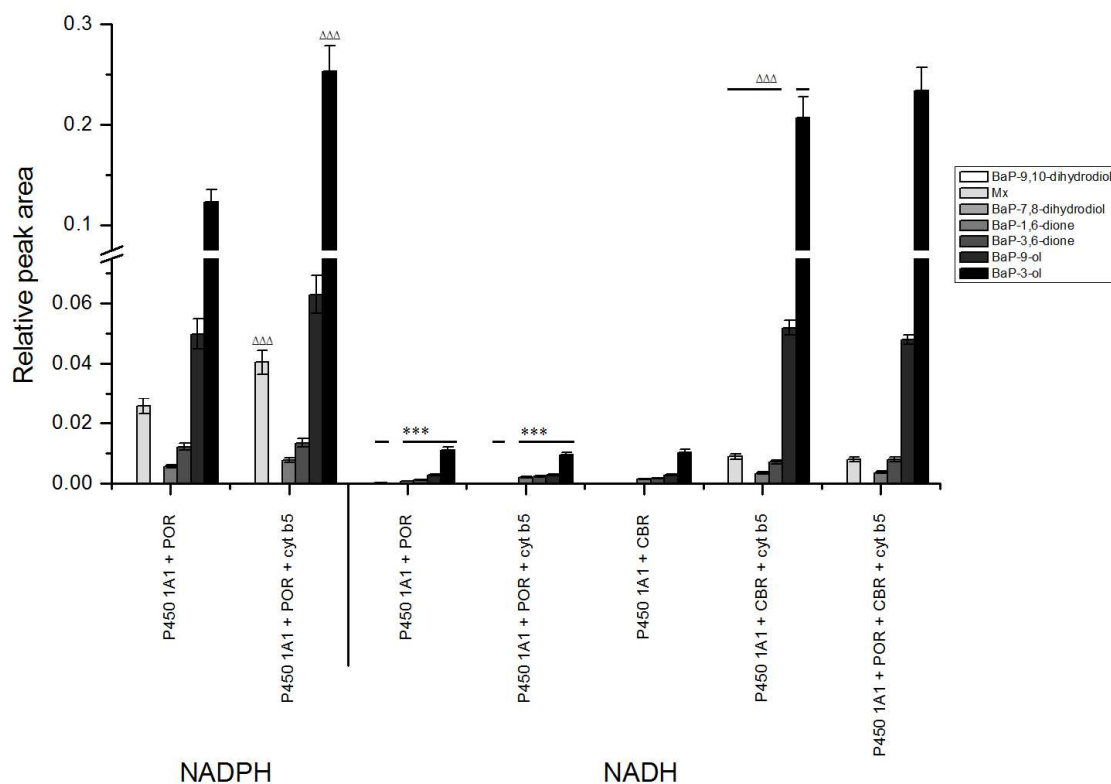

Supplement: tx6b00143_si_001.pdf [file tx6b00143_si_001.pdf]
